# Supplementary material for: COVID-19 mortality in Lombardy: the vulnerability of the oldest old and the resilience of male centenarians
Source: publisher site journal article supplement (doi:10.18632/aging.103872), 2020-08-12
Supplement: Supplementary file [file aging-v12i15-103872-supplementary-material-SD1.pdf]

## SUPPLEMENTARY FIGURE

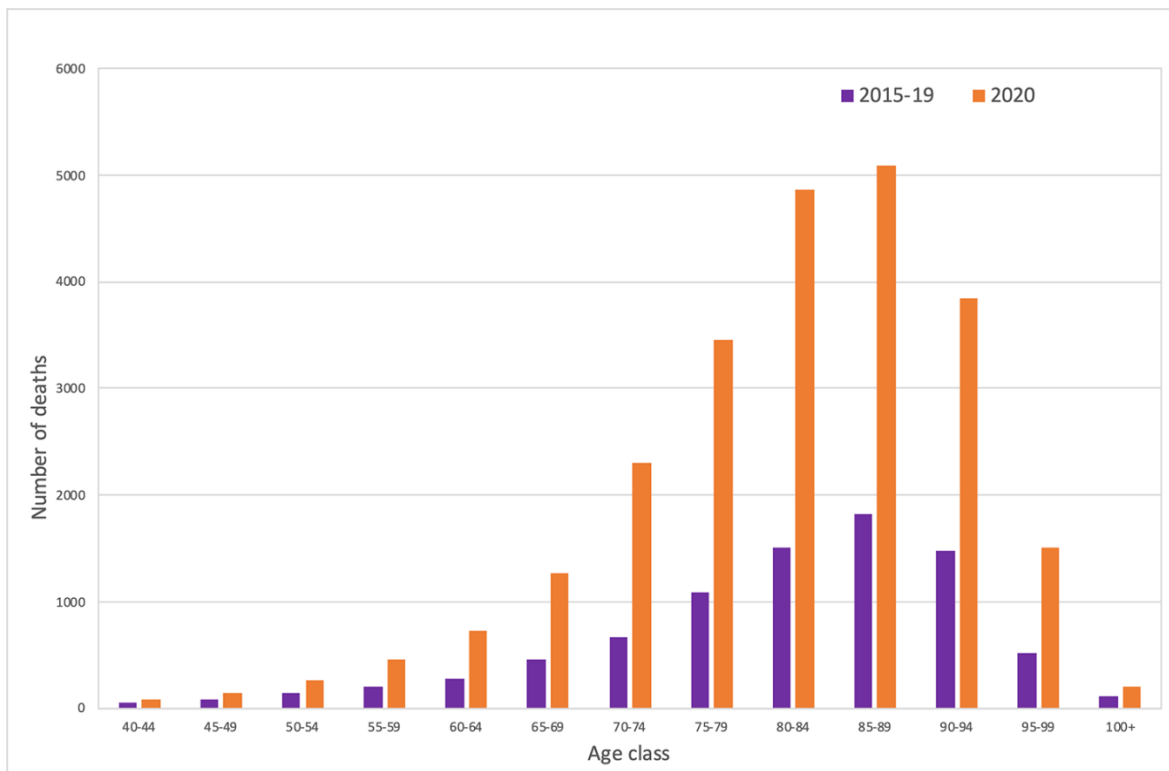

Supplementary Figure 1. Total number of deaths in March in Lombardy, by age class and year.
